# Supplementary material for: Bi2O3 nanoparticles exhibit potent broad-spectrum antimicrobial activity and the ability to overcome Ag-, ciprofloxacin- and meropenem-resistance in P. aeruginosa: the next silver bullet of metal antimicrobials?
Source: Royal Society of Chemistry journal article supplement (doi:10.1039/d1bm01844b), 2022-01-01
Supplement: d1bm01844b1.pdf [file d1bm01844b1.pdf]

## Electronic Supporting Information

Bi<sub>2</sub>O<sub>3</sub> nanoparticles exhibit potent broad-spectrum antimicrobial activity and the ability to overcome Ag-, ciprofloxacin- and meropenem-resistance in *P. aeruginosa*: the next silver bullet of metal antimicrobials?

Bishnu D. Pant, Bogdan M. Benin, Nalin Abeydeera<sup>1</sup>, Min-Ho Kim, Songping D. Huang

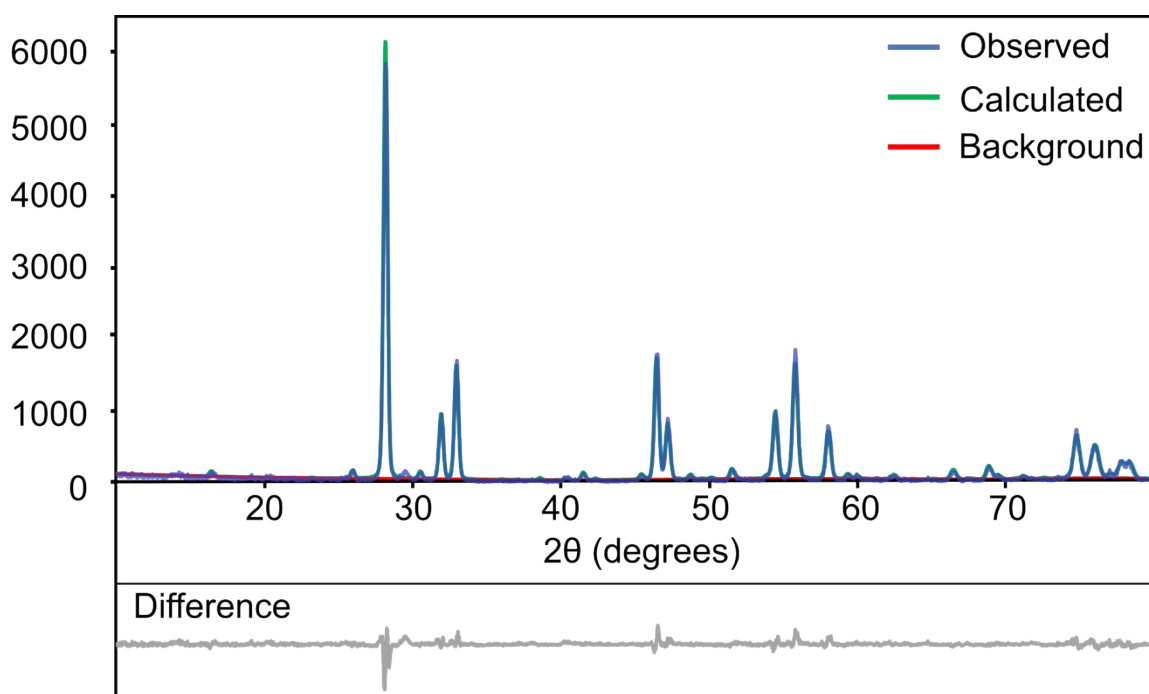

**Figure S1.** Rietveld refinement of bulk Bi<sub>2</sub>O<sub>3</sub>. Reference pattern calculated from ICSD#28443.

a

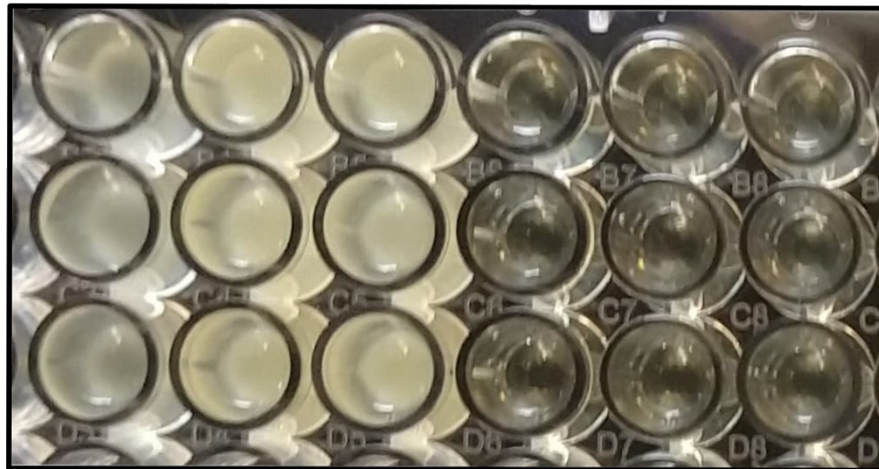

Control 1.5 2.0 2.5 3.0 3.5  
Concentration of Bi<sub>2</sub>O<sub>3</sub> NPs (µg/mL)

|                |            |            |            |            |            |
|----------------|------------|------------|------------|------------|------------|
| 0.8561         | 0.8322     | 0.4629     | 0.0063     | 0.0042     | 0.0030     |
| 0.8735         | 0.7934     | 0.4576     | 0.0069     | 0.0039     | 0.0019     |
| 0.8356         | 0.8061     | 0.4425     | 0.0078     | 0.0034     | 0.0017     |
| <b>Control</b> | <b>1.5</b> | <b>2.0</b> | <b>2.5</b> | <b>3.0</b> | <b>3.5</b> |

Concentration of Bi<sub>2</sub>O<sub>3</sub> NPs (µg/ml)

b

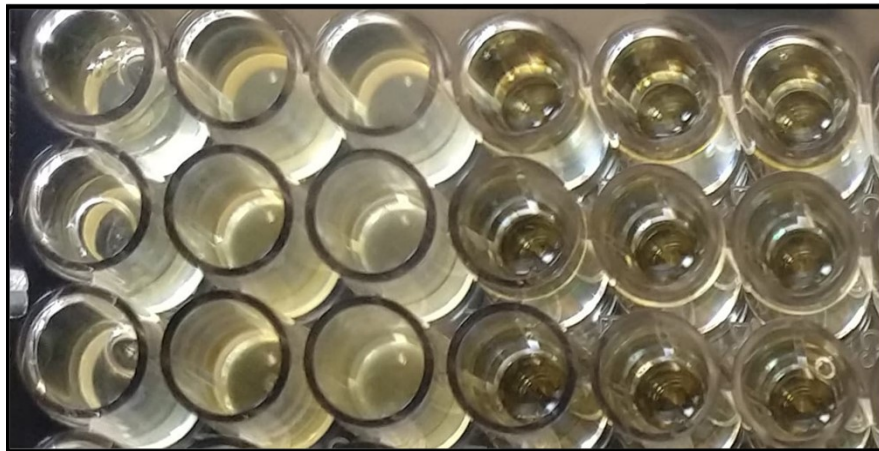

Control 0.25 0.5 0.75 1.0 1.25  
Concentration of Bi<sub>2</sub>O<sub>3</sub> NPs (µg/mL)

|                |             |            |             |            |             |
|----------------|-------------|------------|-------------|------------|-------------|
| 0.8183         | 0.7736      | 0.3929     | 0.0046      | 0.0035     | 0.0016      |
| 0.7875         | 0.7811      | 0.3577     | 0.0056      | 0.0048     | 0.0008      |
| 0.7761         | 0.7525      | 0.3625     | 0.0048      | 0.0031     | 0.0019      |
| <b>Control</b> | <b>0.25</b> | <b>0.5</b> | <b>0.75</b> | <b>1.0</b> | <b>1.25</b> |

Concentration of Bi<sub>2</sub>O<sub>3</sub> NPs (µg/ml)

**Figure S2.** Representative images and un-processed raw optical density values of MIC test of Bi<sub>2</sub>O<sub>3</sub>-NPs, against (a) SA and (b) PA.

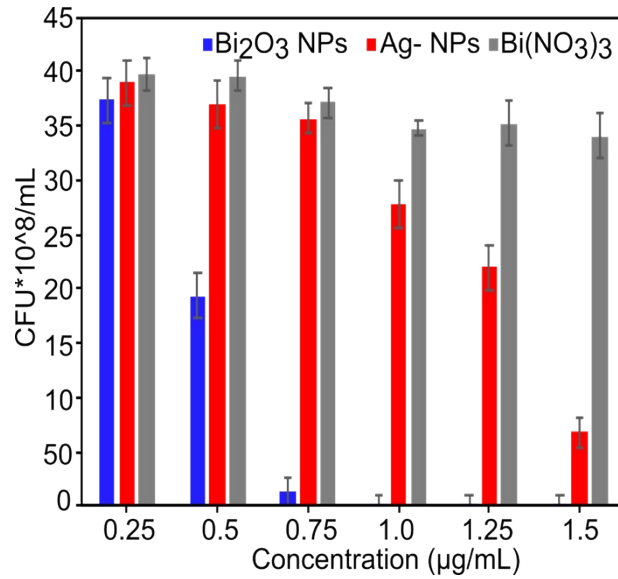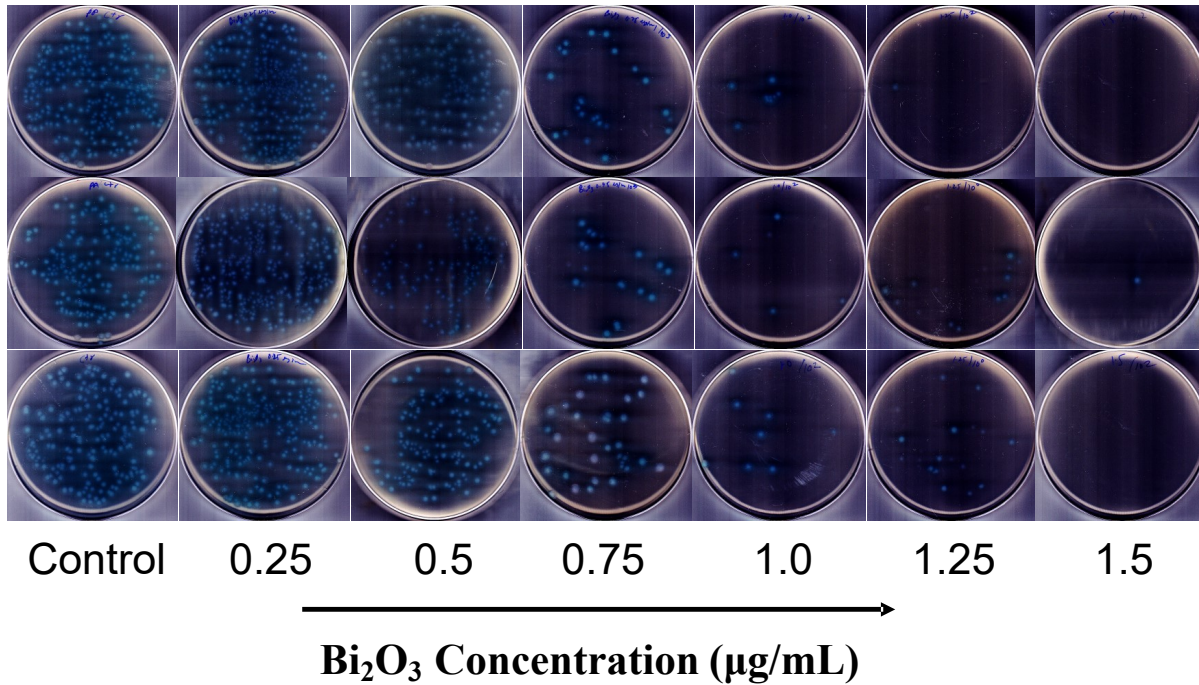

**Figure S3.** Representative plot of CFU enumeration results of Bi<sub>2</sub>O<sub>3</sub>-NPs, against PA showing LD<sub>50</sub> = 0.5 µg/mL and representative images of CFU enumeration results of Bi<sub>2</sub>O<sub>3</sub>-NPs against PA.

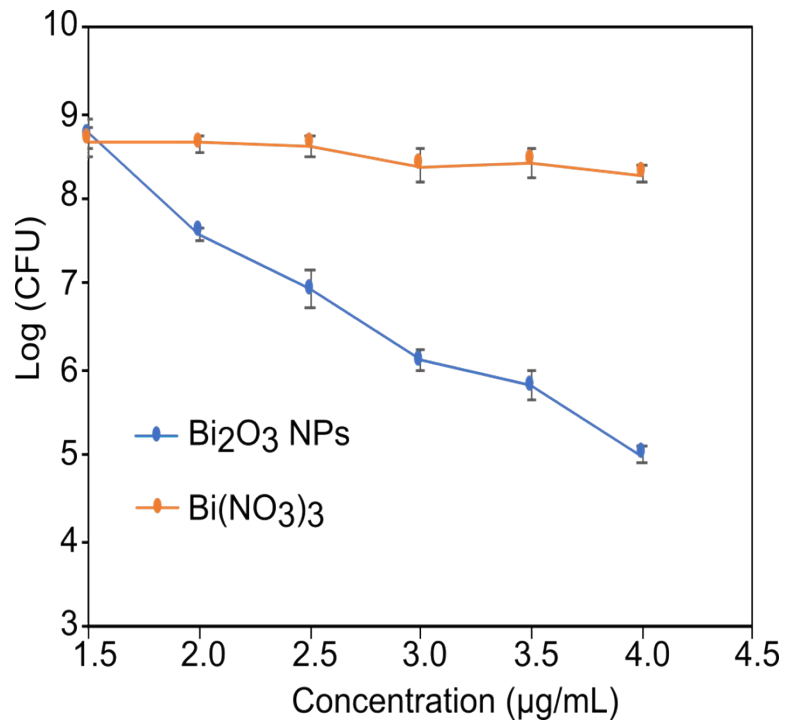

**Figure S4.** CFU enumeration results of Bi<sub>2</sub>O<sub>3</sub> NPs for SA.

**Table S1.** MIC of Bi<sub>2</sub>O<sub>3</sub> NPs against Ag-, ciprofloxacin-, and meropenem-resistant PA.

| Bacteria           | MIC (µg/ml) |
|--------------------|-------------|
| PA <sub>Ag</sub>   | 1.0         |
| PA <sub>cip</sub>  | 0.75        |
| PA <sub>mero</sub> | 1.25        |

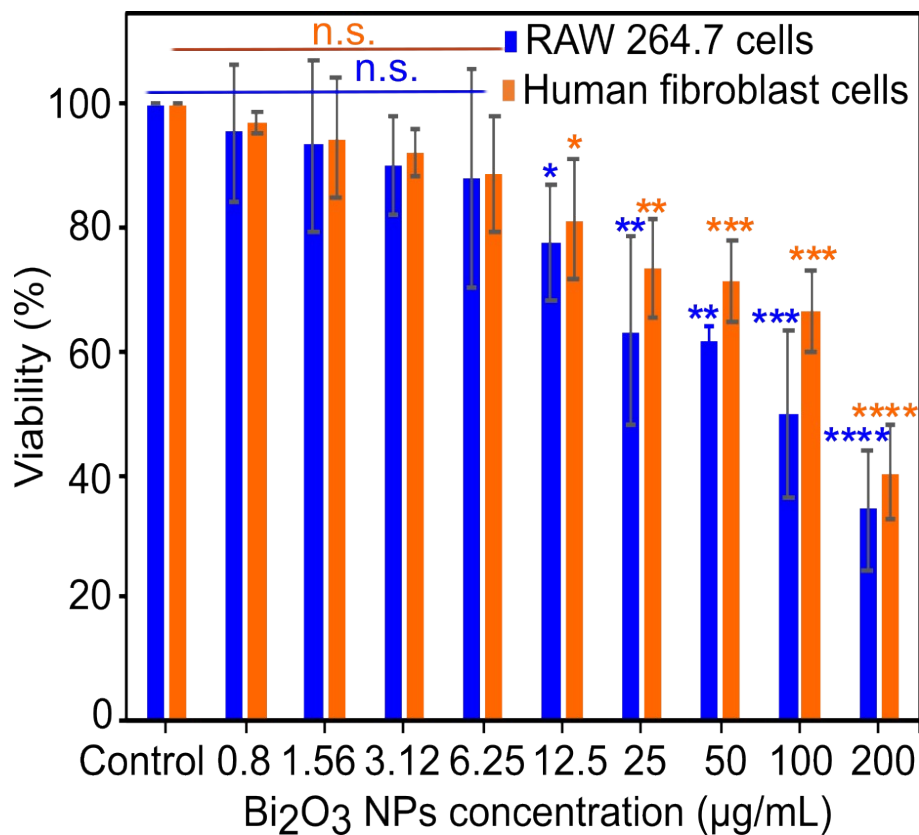

**Figure S5.** Cell viability curves of Bi<sub>2</sub>O<sub>3</sub> NPs against HDFs (a) RAW 264.7 cells and human fibroblast cells. (n.s. = not significant), \* ( $p < 0.05$ ), \*\* ( $p < 0.01$ ), \*\*\* ( $p < 0.001$ ), and \*\*\*\* ( $p < 0.0001$ ).

**Table S2.** FIC index of Bi<sub>2</sub>O<sub>3</sub> NPs in combination with meropenem antibiotic.

| MIC (µg/mL) against DRPA |                                |                                |                                      | FIC index |
|--------------------------|--------------------------------|--------------------------------|--------------------------------------|-----------|
| Mero                     | Mero+                          | Bi <sub>2</sub> O <sub>3</sub> | Bi <sub>2</sub> O <sub>3</sub> +mero | 0.45      |
|                          | Bi <sub>2</sub> O <sub>3</sub> |                                |                                      |           |
| 2.0                      | 0.25                           | 0.75                           | 0.25                                 |           |
